## CORRECTION

# Correction: Regulation of UNC-40/DCC and UNC-6/Netrin by DAF-16 promotes functional rewiring of the injured axon

Atrayee Basu, Sibaram Behera, Smriti Bhardwaj, Shirshendu Dey and Anindya Ghosh-Roy

There was an error in Development (2021) **148**, dev198044 (doi:10.1242/dev.198044).

An incorrect reference was included and cited in three places. This has been changed to a more appropriate reference.

On p. 2 and p. 13, the citation Rongo and Kaplan (1999) has been replaced with Hoerndli et al. (2015). In Table S2 in the supplementary material, the *akIs141(Prig-3::glr-1::GFP)* allele is now attributed to Hoerndli et al. (2015).

In the References,

**Rongo, C. and Kaplan, J. M.** (1999). CaMKII regulates the density of central glutamatergic synapses in vivo. *Nature* **402**, 195-199. doi:10.1038/46065

has been replaced with

**Hoerndli, F. J., Wang, R., Mellem, J. E., Kallarackal, A., Brockie, P. J., Thacker, C., Madsen, D. M. and Maricq, A. V.** (2015). Neuronal activity and CaMKII regulate kinesin-mediated transport of synaptic AMPARs. *Neuron* **86**, 457-474. doi:10.1016/j.neuron.2015.03.011

Both the online full-text and PDF versions of the article, and Table S2 have been updated.

The authors apologise to readers for this error, which does not impact the results or conclusions of the paper.

[View Original Article](#)
